# Supplementary material for: Comprehensive Criteria for Reporting Qualitative Research–(CCQR): Reporting Guideline for Global Health Qualitative Research Methods
Source: Preprints.org preprint supplement (doi:10.20944/preprints202406.1690.v1), 2024-06-24
Supplement: Supplementary file 1 [file supplementary]

**Database search- PUBMED**

| 1 | Qualitative research outcomes | Title/Abstract, English language, Date: 2003 – 2023. Search Screen: Advanced Search | 131 |
| --- | --- | --- | --- |
| 2 | Qualitative research outcomes | Title/Abstract, English language, Date: 2003 – 2023. Search Screen: Advanced Search  Free Full Text | 80 |
| 3 | Qualitative research standards | Title/Abstract, English language, Date: 2003 – 2023. Search Screen: Advanced Search | 5 |
| 4 | Qualitative research methods guidelines | Title/Abstract, English language, Date: 2003 – 2023. Search Screen: Advanced Search | 12 |
| 5 | Qualitative research reporting | Title/Abstract, English language, Date: 2003 – 2023. Search Screen: Advanced Search | 29 |
| 6 | Reporting qualitative research | Title/Abstract, English language, Date: 2003 – 2023. Search Screen: Advanced Search  Free Full Text | 469 |
| 7 | Reporting guidelines in qualitative research | Title/Abstract, English language, Date: 2003 – 2023. Search Screen: Advanced Search | 0 |
| 8 | Qualitative research reporting guidelines | Title/Abstract, English language, Date: 2003 – 2023. Search Screen: Advanced Search | 6 |
